# Supplementary material for: Changepoint detection in base-resolution methylome data reveals a robust signature of methylated domain landscape
Source: PubMed Central journal article supplement (PMC4534107; doi:10.1186/s12864-015-1809-5), 2015-08-12
Supplement: 12864_2015_1809_MOESM1_ESM.pdf [file 12864_2015_1809_MOESM1_ESM.pdf]

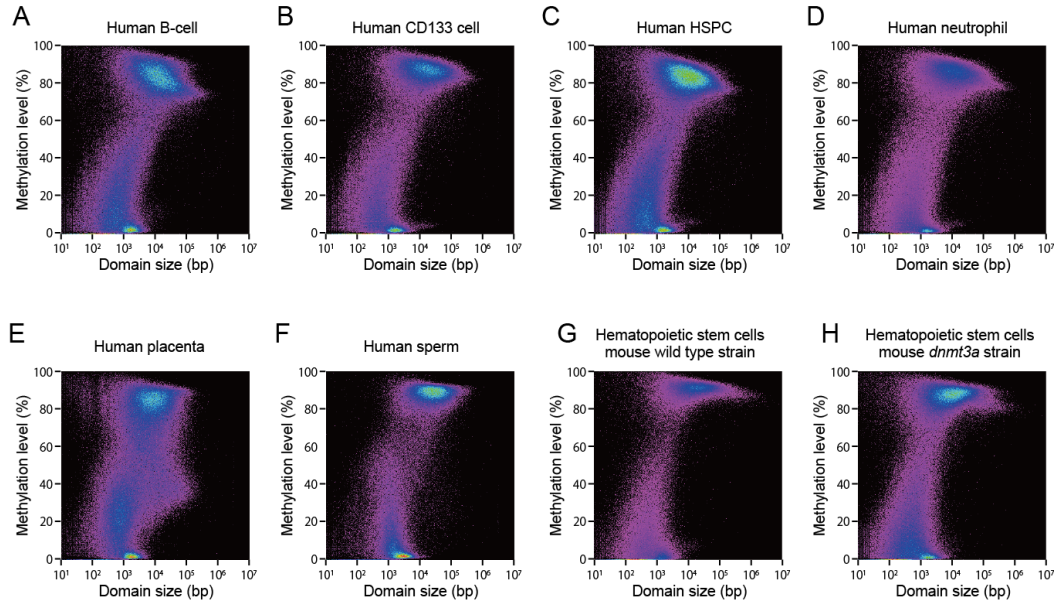

**Additional file 1 – MDL plots for eight publicly available WGBS data**

(A~D) Human hematopoietic lineages [19]. (E) Human placenta [16]. (F) Human sperm [23]. (G, H) Mouse hematopoietic stem cells from wild type and *dnmt3a* KO mice [20].
