# Supplementary material for: Changepoint detection in base-resolution methylome data reveals a robust signature of methylated domain landscape
Source: PubMed Central journal article supplement (PMC4534107; doi:10.1186/s12864-015-1809-5), 2015-08-12
Supplement: 12864_2015_1809_MOESM2_ESM.pdf [file 12864_2015_1809_MOESM2_ESM.pdf]

## Blood

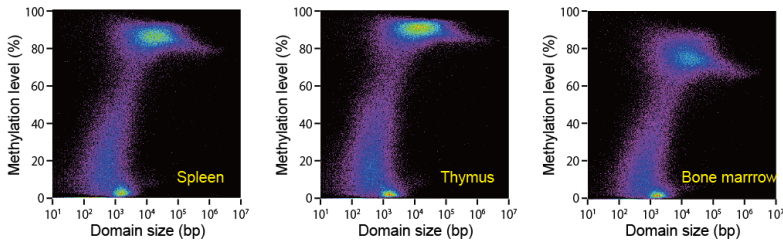

## Endoderm

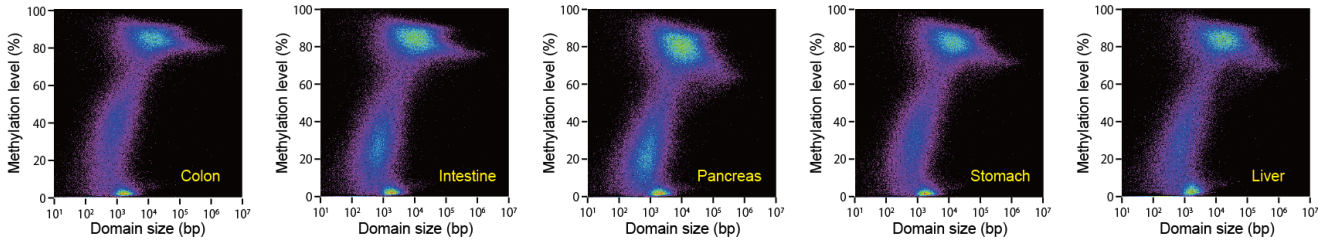

## Mesoderm

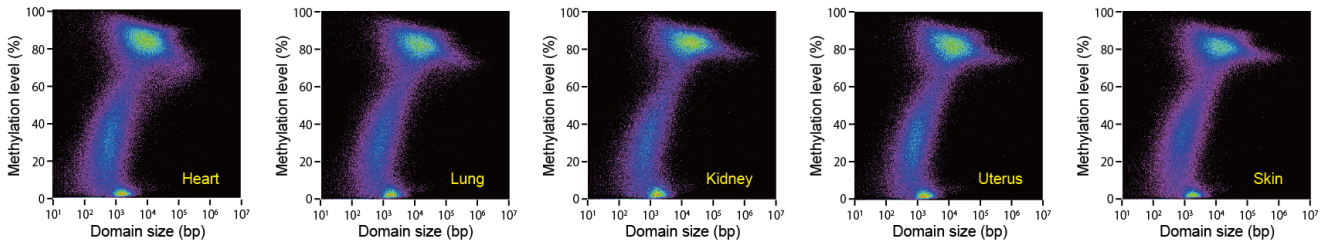

## Ectoderm

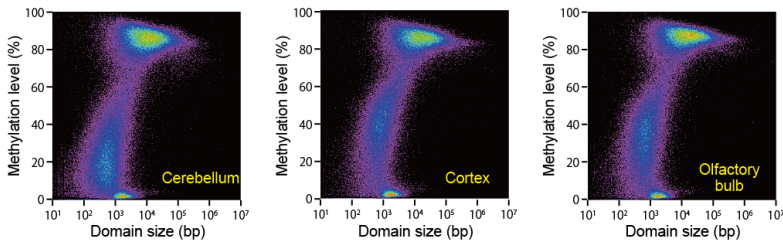

## Other

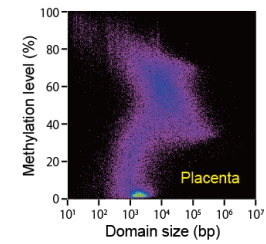

## Additional file 2 – MDL plots for WGBS data on 17 mouse adult tissues

Data from [17] were mapped, changepoint-detected and displayed as MDL plots.
