# Supplementary material for: Changepoint detection in base-resolution methylome data reveals a robust signature of methylated domain landscape
Source: PubMed Central journal article supplement (PMC4534107; doi:10.1186/s12864-015-1809-5), 2015-08-12
Supplement: 12864_2015_1809_MOESM6_ESM.pdf [file 12864_2015_1809_MOESM6_ESM.pdf]

A

| Sample name             | Cell type          | Mean depth | Number of domains (length > 10 bp) |
|-------------------------|--------------------|------------|------------------------------------|
| H1                      | ESC or ESC-derived | 33.3       | 71,283                             |
| Mesenchymal stem cell   | ESC or ESC-derived | 55.5       | 170,898                            |
| Mesendoderm             | ESC or ESC-derived | 31.3       | 99,353                             |
| Neural progenitor cell  | ESC or ESC-derived | 38.9       | 139,413                            |
| Trophoblast-like cell   | ESC or ESC-derived | 40.6       | 142,294                            |
| IMR90_10                | PMD-positive       | 4.1        | 50,383                             |
| IMR90_20                | PMD-positive       | 8.1        | 144,499                            |
| IMR90_30                | PMD-positive       | 12.1       | 208,981                            |
| IMR90_40                | PMD-positive       | 16.2       | 250,546                            |
| IMR90_50                | PMD-positive       | 20.3       | 278,634                            |
| IMR90_60                | PMD-positive       | 24.4       | 295,620                            |
| IMR90_70                | PMD-positive       | 28.4       | 305,316                            |
| IMR90_80                | PMD-positive       | 32.5       | 313,744                            |
| IMR90_90                | PMD-positive       | 36.4       | 318,776                            |
| IMR90_100               | PMD-positive       | 40.5       | 324,456                            |
| Placenta                | PMD-positive       | 9.3        | 308,166                            |
| Mammary epithelial cell | PMD-positive       | 20.1       | 292,602                            |
| Breast cancer           | PMD-positive       | 31.7       | 316,413                            |
| B cell                  | Hematopoietic      | 12.3       | 229,717                            |
| CD133 hsc               | Hematopoietic      | 10.6       | 212,253                            |
| Hspc                    | Hematopoietic      | 31.7       | 333,716                            |
| Neutrophil              | Hematopoietic      | 10.0       | 256,623                            |
| Sperm                   | Sperm              | 7.3        | 162,496                            |

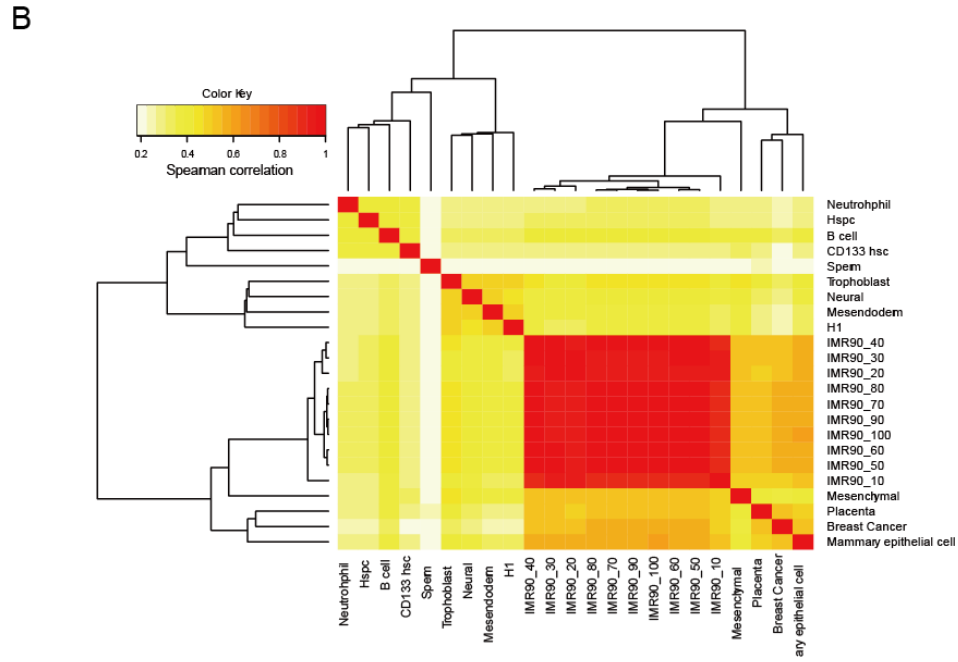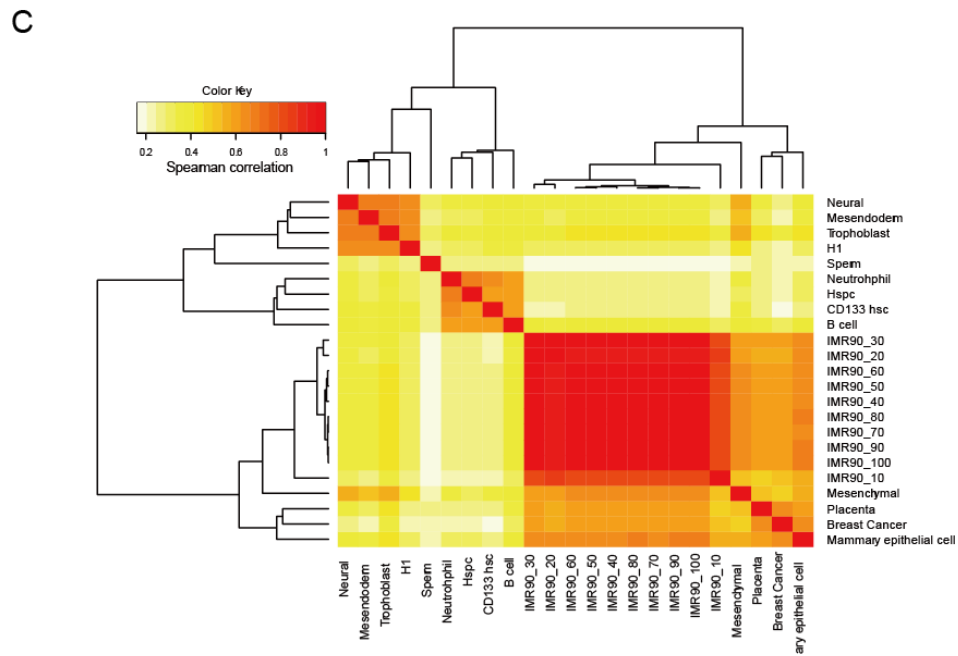

### Additional file 6 – Unsupervised clustering of MDL plots

(A) List of WGBS data used for the unsupervised clustering of MDL plots in Figure 4A. (B and C) Ward's clustering of the same WGBS data as (A) using the Spearman's rank-order correlation of the methylation levels of individual CpG sites (B) or sliding windows (window size, 1000 bp; step size, 1000 bp) (C).
