# Supplementary material for: Changepoint detection in base-resolution methylome data reveals a robust signature of methylated domain landscape
Source: PubMed Central journal article supplement (PMC4534107; doi:10.1186/s12864-015-1809-5), 2015-08-12
Supplement: 12864_2015_1809_MOESM7_ESM.pdf [file 12864_2015_1809_MOESM7_ESM.pdf]

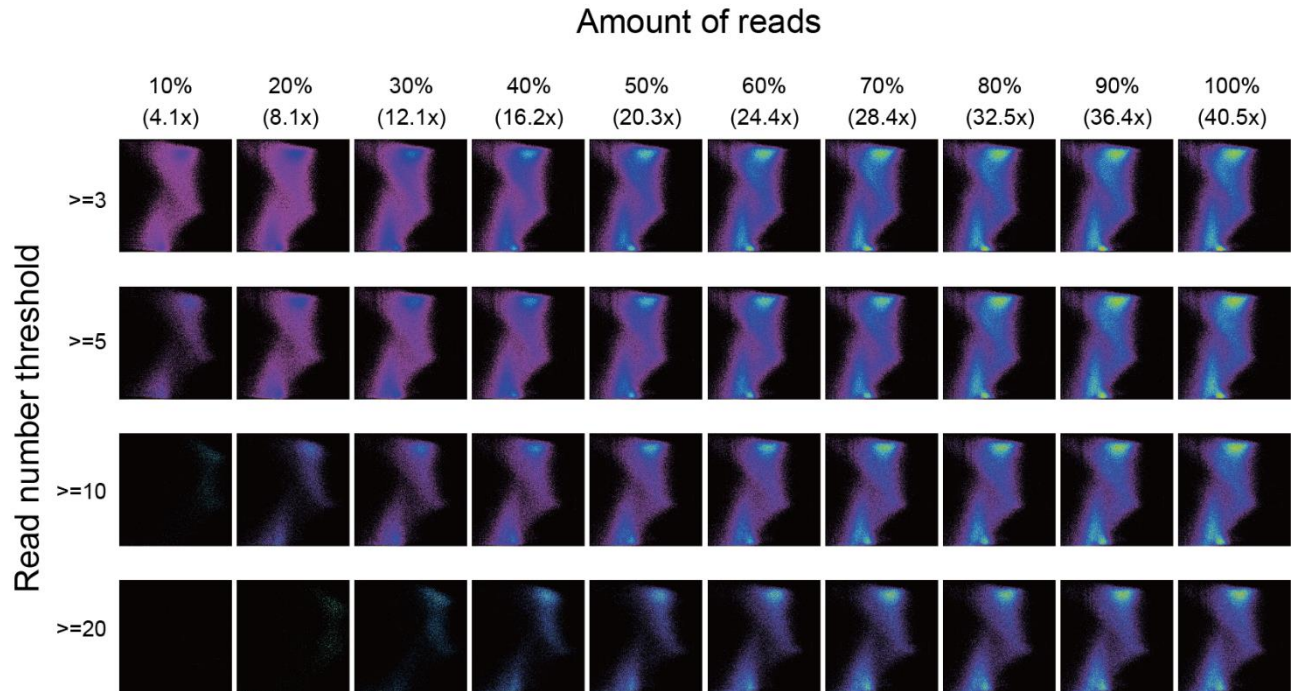

#### Additional file 7 – Effects of data size on MDL plots

The ten variously downsized IMR90 datasets were used for MDL plots under four different thresholds of minimal read depth (i.e.,  $\geq 3$ ,  $\geq 5$ ,  $\geq 10$  or  $\geq 20$  reads). The number in parenthesis indicates the mean depth of genomic coverage.
