# Supplementary material for: Changepoint detection in base-resolution methylome data reveals a robust signature of methylated domain landscape
Source: PubMed Central journal article supplement (PMC4534107; doi:10.1186/s12864-015-1809-5), 2015-08-12
Supplement: 12864_2015_1809_MOESM8_ESM.pdf [file 12864_2015_1809_MOESM8_ESM.pdf]

| Tool                        | Major parameters                                                             | Computational time<br>(hh:mm:ss) |
|-----------------------------|------------------------------------------------------------------------------|----------------------------------|
| SimpleChangepointCalculator | Penalty=1, Minimum Read Depth=5                                              | 00:10:49                         |
| R package "changept"        | Penalty=default (AIC), Minimum Read Depth=5,<br>Calculation of changept=PELT | 01:01:06                         |
| R package "MethylSeekR"     | Minimum Read Depth=10, Chromosome for<br>training HMM for PMD masking=chr22  | 00:45:41                         |

### **Additional file 8 – Performance comparison among methylome segmentation tools**

Three tools for methylome segmentation were compared in terms of computational time using the IMR90 WGBS data [4] mapped to the human genome reference sequence hg18. Major parameters were set as indicated in the second column, whereas all the others were set as default. Computation was performed on a machine equipped with 24 CPU cores (Opteron 6168, 1.9 GHz) and a 64-GByte main memory. One CPU core or a single thread was assigned to each calculation and wall-clock time was measured.
